# 1 Using the drug-protein interactome to identify 2 anti-ageing compounds for humans

3

4 Matías Fuentealba Valenzuela<sup>1,2</sup>, Handan Melike Dönertaş<sup>2</sup>, Rhianna  
5 Williams<sup>1</sup>, Johnathan Labbadia<sup>1</sup>, Janet Thornton<sup>2</sup>, Linda Partridge<sup>1,3\*</sup>

6

7 <sup>1</sup> Institute of Healthy Ageing, Department of Genetics, Evolution and Environment,  
8 University College London, London, UK

9 <sup>2</sup> European Molecular Biology Laboratory, European Bioinformatics Institute,  
10 Wellcome Genome Campus, Hinxton, UK

11 <sup>3</sup> Max Planck Institute for Biology of Ageing, Cologne, Germany

12

13 \* Corresponding author

14 E-mail: [linda.partridge@ucl.ac.uk](mailto:linda.partridge@ucl.ac.uk)

15

## 16 **Abstract**

17 Advancing age is the dominant risk factor for most of the major killer diseases in  
18 developed countries. Hence, ameliorating the effects of ageing may prevent multiple  
19 diseases simultaneously. Drugs licensed for human use against specific diseases have  
20 proved to be effective in extending lifespan and healthspan in animal models,  
21 suggesting that there is scope for drug repurposing in humans. New bioinformatic  
22 methods to identify and prioritise potential anti-ageing compounds for humans are  
23 therefore of interest. In this study, we first used drug-protein interaction information, to  
24 rank 1,147 drugs by their likelihood of targeting ageing-related gene products in

25 humans. Among 19 statistically significant drugs, 6 have already been shown to have  
26 pro-longevity properties in animal models ( $p < 0.001$ ). Using the targets of each drug,  
27 we established its association with ageing at multiple levels of biological actions  
28 including pathways, functions and protein interactions. Finally, combining all the data,  
29 we calculated a comprehensive ranked list of drugs that predicted tanespimycin, an  
30 inhibitor of HSP-90, as the top-ranked novel anti-ageing candidate. We experimentally  
31 validated the pro-longevity effect of tanespimycin through its HSP-90 target in  
32 *Caenorhabditis elegans*.

33

34 **keywords:** human ageing, drug-protein interactions, drug repurposing, anti-ageing,  
35 longevity, lifespan, heat shock protein inhibitor, tanespimycin.

36

### 37 **Author Summary**

38 Human life expectancy is continuing to increase worldwide, as a result of successive  
39 improvements in living conditions and medical care. Although this trend is to be  
40 celebrated, advancing age is the major risk factor for multiple impairments and chronic  
41 diseases. As a result, the later years of life are often spent in poor health and lowered  
42 quality of life. However, these effects of ageing are not inevitable, because very long-  
43 lived people often suffer rather little ill-health at the end of their lives. Furthermore,  
44 laboratory experiments have shown that animals fed with specific drugs can live longer  
45 and with fewer age-related diseases than their untreated companions. We therefore need  
46 to identify drugs with anti-ageing properties for humans. We have therefore used  
47 computers to search for drugs that affect components and processes known to be  
48 important in human ageing. This approach worked, because it was able to re-discover  
49 several drugs known to increase lifespan in animal models, plus some new ones,

50 including one that we tested experimentally and validated in this study. These drugs are  
51 now a high priority for animal testing and for exploring effects on human ageing.

52

## 53 **Introduction**

54 Increasing life expectancy in developed countries is revealing advancing age as the  
55 primary risk factor for numerous diseases [1]. Thus, identifying interventions that can  
56 ameliorate the effects of ageing, and consequently delay, prevent or lessen the severity  
57 of age-related conditions, are needed. Extensive research in laboratory animals has  
58 demonstrated that the ageing process is malleable and that dietary, genetic and  
59 pharmacological interventions can improve health during ageing, extend lifespan and  
60 combat pathologies [2]. Furthermore, humans who lived to advanced ages show lower  
61 late-life morbidity (disease burden) than those who die earlier, indicating that  
62 compression of morbidity is achievable [3].

63

64 Although pharmacological interventions may prove to ameliorate the effects of ageing  
65 in humans, development of new drugs for this purpose would present significant  
66 difficulties, because of the need to treat healthy individuals in clinical trials over long  
67 periods for multiple outcomes. For this reason, it is more feasible to repurpose drugs  
68 already approved for specific diseases than to target ageing itself with new drugs [4,5].

69 With this goal in mind, researchers have begun to conduct human clinical trials to assess  
70 the anti-ageing properties of drugs approved to treat human medical conditions, and that  
71 extend lifespan and healthspan in animal models. Some examples include the anti-  
72 diabetic drugs metformin (National Clinical Trial (NCT) number: NCT02432287) [6]  
73 and acarbose (NCT02953093), the immunosuppressant sirolimus (NCT02874924) and  
74 related compounds [7,8], and the natural compound resveratrol (NCT01842399). Two

75 natural metabolites, the NAD precursors nicotinamide riboside (NCT02950441) and  
76 nicotinamide mononucleotide [9] are also being investigated. The development of  
77 computational methods to complement and accelerate this approach, by prioritising  
78 approved drugs that could ameliorate human ageing, is needed.

79

80 Several bioinformatic methods have been developed to identify potential geroprotective  
81 drugs. For instance, caloric restriction (CR) mimetics have been identified, by  
82 comparing genes differentially expressed in rat cells exposed to sera from CR rats and  
83 rhesus monkeys with gene expression changes caused by drugs in cancer cell lines [10].  
84 Structural and sequence information on ageing-related proteins have been combined  
85 with experimental binding affinity and bioavailability data to rank chemicals by their  
86 likelihood of modulating ageing in the worm *Caenorhabditis elegans* and the fruit fly  
87 *Drosophila melanogaster* [11]. Drug-protein interaction information has also been used  
88 to predict novel pro-longevity drugs for *C. elegans*, by implementing a label  
89 propagation algorithm based on a set of effective and ineffective lifespan-extending  
90 compounds and a list of ageing-related genes [12]. A similar approach used a random  
91 forest algorithm and chemical descriptors of ageing-related compounds from the  
92 DrugAge database [13] together with gene ontology (GO) terms related to the drug  
93 targets [14]. Enrichment of drug targets has been assessed for a set of human  
94 orthologues of genes modulating longevity in animal models to identify new anti-ageing  
95 candidates [15].

96

97 Despite the increasing interest in drug-repurposing for human ageing, research has  
98 tended to focus on predicting life-extending drugs for animal models. However, the  
99 translation from non-mammalian species to humans is still a challenge, and certain

100 aspects of ageing may be human-specific. Only a few studies have focused on data from  
101 humans. For instance, Aliper et al. (2016) [16] applied the GeroScope algorithm [17] to  
102 identify drugs mimicking the signalome of young human subjects based on differential  
103 expression of genes in signalling pathways involved in the ageing process. Another  
104 study by Dönertas et al. (2018) [18] correlated a set of genes up- and down-regulated  
105 with age in the human brain with drug-mediated gene expression changes in cell lines  
106 from the Connectivity Map [19].

107

108 In the present study, we rank-ordered drugs according to their probability of affecting  
109 ageing, by measuring whether they targeted more genes related with human ageing than  
110 expected by chance, by calculating the statistical significance of the overlap between the  
111 targets of each drug and a list of human ageing-related genes using a Fisher's exact test  
112 [20]. Additionally, to enhance the power of the approach, we mapped the drugs' gene  
113 targets and ageing-related genes to pathways (KEGG, Reactome), gene ontology terms  
114 (biological processes, cellular components, molecular functions) and protein-protein  
115 interactions, and repeated the analysis. We found that, independently of the data source  
116 used, the analysis resulted in a list of drugs significantly enriched for compounds  
117 previously shown to extend lifespan in laboratory animals. We integrated the results of  
118 7 ranked lists of drugs, calculated using the different data sources, into a single list, and  
119 we experimentally validated the top compound, tanespimycin, an HSP-90 inhibitor, as a  
120 novel pro-longevity drug.

## 121 **Results**

### 122 **Defining a dataset of drug-protein interactions and ageing-related genes**

123 The drug-ageing association was inferred by comparing drug-gene interactions with  
124 gene-ageing associations. Fig 1 presents an overview of the procedure to prioritise the  
125 compounds. A dataset containing the interactions between drugs and proteins was built  
126 based on data from the STITCH database [21]. Only drugs targeting human proteins and  
127 successfully mapped to the DrugBank database [22] using the UniChem resource [23]  
128 were kept (Fig 1A). The dataset was composed of 18,393 interactions between 2,495  
129 drugs and 2,991 proteins. More than half of the drugs (51.1%) in the dataset are  
130 approved for human use, 18.6% are in some phase of the approval process and 28.4%  
131 have been shown to bind to disease targets in experiments.

132

133 We obtained a set of ageing-related genes from the Aging Clusters resource [24]. A  
134 total of 1,216 ageing-related genes discovered in at least 2 among 4 categories of studies  
135 were selected. These 4 categories are human genes: i) changing expression with age or  
136 CR in different tissues ii) whose DNA methylation levels changes with age iii)  
137 associated with age-related diseases and iv) in manually curated databases of genes  
138 linked with longevity in genetic studies [25], associated with cellular senescence [26] or  
139 showing ageing-related effects in animal models in addition to evidence for a causative  
140 role in human ageing [27].

141

### 142 **Gene-based inference of drug-ageing associations**

143 We determined if there was evidence supporting an association between drugs and  
144 ageing-related genes by calculating the statistical significance of the overlap between  
145 the gene targets of each drug and the ageing-related genes (Fig 1B). From the 1,147

146 drugs analysed, 19 were statistically enriched for ageing-related targets after multiple  
147 testing correction (Table 1, S1 tables). To assess the capability of the method to  
148 prioritise pro-longevity compounds, we compared the list of top-ranked compounds  
149 with the DrugAge database [13]. Six out of the 19 drugs have already been reported to  
150 significantly extend the lifespan of at least one model organisms (S2 text), while only 1  
151 was expected by chance ( $p < 0.001$ ). Additionally, using literature mining, we identified  
152 studies showing the association with longevity of cAMP analogues [28], selenium  
153 [29,30] and tanespimycin [31,32]. In contrast, we also found evidence for the DNA-  
154 mediated, pro-ageing (anti-longevity) effects of doxorubicin [33], cisplatin [34] and  
155 hydrogen peroxide [35]. We performed an interaction-based similarity analysis and  
156 found that the genotoxic compounds cluster separately from the other drugs, suggesting  
157 that they have a similar mechanism of action (S2 text). Similarities were also identified  
158 regarding the mechanisms of action of sorafenib and regorafenib, bexarotene and GW-  
159 501516, and sirolimus and ECGC, in agreement with previous studies [36].

160

161 Although drugs interact directly with proteins, proteins do not act alone and interact  
162 with other proteins within pathways to perform different functions. Anti-ageing effects  
163 are likely to be mediated through altered pathway activity and function, and we  
164 therefore investigated if we could enhance the prediction of pro-longevity drugs using  
165 other biological annotations as comparators. Therefore, we calculated the pathways and  
166 gene functions enriched in ageing-related genes, together with the proteins that interact  
167 with them. A total of 82 KEGG and 54 Reactome pathways were enriched in this set of  
168 genes, as well as 1,177 biological processes, 69 cellular components and 103 molecular  
169 functions. In addition, we calculated that 676 proteins interacted with the set of ageing-  
170 related genes. These terms, mapped at different biological levels, were defined as the set

171 of ageing-related terms (Fig 1C – left). Equivalently, drugs were then associated with  
172 these terms through association with their targets using the list of genes defining each  
173 term according to the DAVID knowledgebase [37] and the biological database network  
174 [38]. This mapping procedure resulted in a set of terms from each data source related to  
175 each drug (drug-related terms) (Fig 1C – right).

176

177 **Drug-ageing association based on protein-protein interactions, gene ontology and**  
178 **pathways**

179 Analogously to the gene-based association analysis, we calculated for each level if the  
180 overlap between ageing-related terms and drug-related terms was statistically significant  
181 using a Fisher's exact test. This procedure generated 6 lists of ranked compounds in  
182 addition to the gene-based analysis (S1 tables). Notably, when we evaluated the  
183 correlation between the ranking of compounds in the different lists (Fig 2A), we  
184 observed a moderate correlation (Kendall's coefficient of concordance  $W = 0.58$ , p-  
185 value =  $1.02E-266$ ). The highest correlations were observed between the results from  
186 biological processes and cellular components (Kendall's tau =  $0.51$ , p-value <  $2.2E-16$ ),  
187 while the lowest was observed between cellular components and genes (Kendall's tau =  
188  $0.16$ , p-value =  $3.289E-11$ ).

189

190 Because in any enrichment analysis there is a potential for research bias, we performed  
191 random permutations to simulate the enrichment of each drug for a different set of terms  
192 on each level. None of the top-ranked drugs on each list ranked higher than in the  
193 analysis in more than 1.7% of the simulations (Table A in S2 text). We also quantified  
194 the capability of the strategy to prioritise pro-longevity compounds by calculating for  
195 each list the fraction of known pro-longevity compounds (ranked by p-value) among the



196 fraction of drugs considered in each analysis (Fig 2B). The enrichment for pro-longevity  
197 compounds was quantified by calculating the area under the curve (AUC) generated by  
198 plotting these two variables. The maximum AUC was obtained when biological  
199 processes or molecular functions (AUC = 0.69) was used as the comparator (Table B in  
200 S2 text). The use of genes showed the lowest enrichment when non-statistically  
201 significant drugs are considered (AUC = 0.59), which suggests that the use of higher  
202 biological levels to calculate the inference improves the prediction capabilities, and that  
203 the use of genes leads to a loss power to rank drugs targeting a low proportion of  
204 ageing-related genes, which is observed in Fig 2B a loss of enrichment after 25% of the  
205 drugs were ranked. We evaluated if the AUCs were statistically significant by  
206 calculating the AUC from the simulations generated to quantify the research bias. The  
207 p-value for each curve was calculated by determining the number of simulated results  
208 with an AUC equal or higher than the analysis. All lists showed a higher enrichment  
209 than expected by chance (AUC > 0.5 and p-value < 0.05, Table B in S2 text). When we  
210 only considered the first 20 top-ranked drugs, we observed that using biological  
211 processes or cellular components to perform the comparison showed the highest  
212 proportion of pro-longevity drugs (45%), while only 2 pro-longevity drugs (10%) were  
213 found among the top 20 drugs when KEGG pathways are used.

214

215 Considering the lack of overlap between the ranked lists using the different data  
216 sources, we decided to integrate the results into a single list accounting for the  
217 complexity of multitiered effect of drugs by calculating their ranking average in the  
218 different analyses. The combination generated a list equally enriched as the maximum  
219 AUC obtained by the previous analysis (AUC = 0.69). Among the top 10 drugs with the  
220 best average ranking (Table 2, S1 tables), we found 3 drugs that have extended lifespan

221 in animal models (trichostatin [39], geldanamycin [10] and celecoxib[40]). Half of these  
222 10 drugs are classified as kinase inhibitors, while 8 are indicated as anti-cancer drugs  
223 and 7 are approved for human use.

224

### 225 **The HSP-90 inhibitor tanespimycin as a novel pro-longevity drug**

226 Leading the joint ranking was tanespimycin, also known as 17-AAG, a well-  
227 characterized HSP-90 inhibitor that has been shown to activate the transcription factor  
228 HSF-1 and induce a heat shock response in multiple model organisms [26]. As a proof-  
229 of-principle, we decided to investigate whether tanespimycin could activate HSF-1 and  
230 extend lifespan in the nematode worm *C. elegans*. To test the efficacy of tanespimycin  
231 dosing in *C. elegans*, we grew worms expressing mCherry under the control of an HSF-  
232 1 responsive promoter [41] on solid media plates containing various doses of  
233 tanespimycin. Worms were exposed to tanespimycin continuously from the first larval  
234 stage (L1) of development, or exclusively from the first day of adulthood. Worms  
235 grown continuously on tanespimycin plates exhibited a dose-dependent activation of the  
236 HSF-1 transcriptional reporter, starting at 25  $\mu\text{M}$  and peaking at 100  $\mu\text{M}$  (Fig 3A-B).  
237 Similarly, exposure to tanespimycin plates exclusively in adulthood resulted in  
238 significant activation of the HSF-1 reporter at 50 and 100  $\mu\text{M}$  concentrations. No  
239 markers of toxicity were observed in any treatment groups, except for the 100  $\mu\text{M}$  larval  
240 group, which were developmentally delayed by 24 hours and had a significantly  
241 reduced brood size (data not shown), consistent with chronic HSP-90 inhibition [42].  
242 Together, these data demonstrate that tanespimycin activates HSF-1 in *C. elegans* and  
243 that treatment exclusively in adulthood is not associated with overt toxicity.

244

245 We next sought to determine whether tanespimycin treatment could extend lifespan in  
246 *C. elegans*. To circumvent potential longevity effects arising from delayed development  
247 and reproduction, we exposed worms to 100  $\mu$ M tanespimycin plates from the first day  
248 of adulthood. Tanespimycin treatment significantly extended median and maximal  
249 lifespan compared to vehicle-treated controls (Fig 3C). To determine whether the  
250 effects of tanespimycin on lifespan require *hsp-90*, we also exposed worms to  
251 tanespimycin treatment in the presence of *hsp-90(RNAi)*. Consistent with previous  
252 reports, *hsp-90(RNAi)* significantly shortened *C. elegans* lifespan [43]. Furthermore, in  
253 the absence of HSP-90, tanespimycin treatment no longer increased lifespan compared  
254 to vehicle controls. These data suggest that tanespimycin treatment extends lifespan in  
255 an *hsp-90* dependent manner, but that severe depletion of HSP-90 is toxic to animals,  
256 despite the activation of protective stress responses.

## 257 **Discussion**

258 This study was designed to infer and rank drugs matched to ageing at multiple levels of  
259 biological activity using a simple statistical test. In an initial gene-centric analysis, 19  
260 drugs were identified as candidates expected to modulate ageing in humans. A major  
261 finding was that 6 of the statistically significant drugs, resveratrol, genistein,  
262 simvastatin, epigallocatechin gallate, celecoxib and sirolimus, have already shown  
263 lifespan-extending properties in experimental studies in model organisms. This  
264 statistically significant enrichment suggests that, despite its simplicity, the method is  
265 able to prioritise pro-longevity compounds. We then expanded the analysis to higher  
266 levels of biological complexity, and again found a statistically significant enrichment  
267 for pro-longevity drugs in all cases. The results of the analysis at different levels  
268 showed a moderate correlation. Compounds ranked high on average included  
269 trichostatin, geldanamycin and celecoxib, 3 drugs with pro-longevity effects in animal  
270 models [10,39,40]. The compound ranked highest on average was tanespimycin, an  
271 HSP-90 inhibitor, shown to act as a senolytic agent by killing human senescent cells  
272 without affecting the viability of healthy cells [31] and to ameliorate disease phenotypes  
273 in *Drosophila* models of Huntington's disease and spinocerebellar ataxia [32]. We  
274 found that tanespimycin treatment extended median (23%) and maximum (16%)  
275 lifespan in *C. elegans*, through its target HSP-90, possibly through the induction of  
276 cytoprotective pathways. Tanespimycin must act through more than one mechanism as  
277 a geroprotector, because cellular senescence has not been reported to occur in *C.*  
278 *elegans*.

279

280 Evidence from the literature supports the anti-ageing action of other drugs that we  
281 identified as potentially geroprotective. Dasatinib, a kinase inhibitor ranked 7<sup>th</sup> on

282 average, has been reported to induce apoptosis in senescent but not non-senescent  
283 primary human umbilical vein endothelial cells and preadipocytes [44]. Combination of  
284 dasatinib and quercetin, which also inhibits HSP-90, induced apoptosis specifically in  
285 senescent murine and human cells in vitro, improved cardiovascular function in aged  
286 mice, and decreased bone loss, neurological dysfunction and frailty in progeroid mice  
287 [45].

288

289 Three of the top 10 compounds from the combined ranked list have been previously  
290 proposed as anti-ageing candidates for humans using bioinformatic analysis.  
291 Specifically, tanespimycin, geldanamycin and trichostatin were among the 24 drugs  
292 predicted by Dönertas et al. (2018)[18] and Calvert et al. (2016)[10]. In contrast, we did  
293 not observe any overlap with the top results from Fernandes et al. (2016)[15] possibly  
294 due to the use of a different drug-protein interaction database (DGIdb [46]) or source of  
295 ageing data.

296

297 Similar enrichment-based methods that combine multiple levels of biological  
298 information have been used for drug-repurposing for Rheumatoid arthritis, Parkinson's  
299 disease and Alzheimer's disease [47,48], but not, to our knowledge, to identify anti-  
300 ageing drugs. Using annotated databases, our method evaluated the enrichment for pro-  
301 longevity of all compounds analysed, rather than only those with significant scores, and  
302 we observe that in all cases pro-longevity compounds are ranked higher than expected  
303 by chance. Although tanespimycin acts as a senolytic [31], and has been predicted to be  
304 geroprotective by two previous studies [10,18], we have demonstrated its effect on  
305 longevity experimentally.

306

307 A limitation of this study is that it is based on previous knowledge about drug-protein  
308 interactions, which for non-commonly studied drugs is incomplete. This may explain  
309 why we observed many anti-cancer and well-known drugs in our results. While we  
310 assessed this bias using permutations and we found no significant effect on our results,  
311 further research is needed to increase the drug-protein interactome data using, for  
312 example, high-throughput technologies like those currently available for kinases [49].  
313 While we combined the results from the different data sources using a strategy based on  
314 ranks, we hypothesise that the integration of these results using other methods may lead  
315 to a list with a higher enrichment for pro-longevity drugs. Additionally, further  
316 experimental testing is required on the lists produced in this study, particularly those  
317 generated by using gene ontology terms, which presented the higher enrichment for pro-  
318 longevity drugs. An inherent limitation of inferred associations is that they do not  
319 provide information about the directionality of the effect, which in this case means that  
320 it is unknown if the drugs will deaccelerate ageing or the opposite. While we indirectly  
321 assessed this using an interaction-based similarity analysis between the drugs, resulting  
322 in clusters or pairs of drugs with similar mechanism of action, experiments should be  
323 conducted to determine the effects of each drug on ageing. Finally, a practical limitation  
324 is that we validated the results of this study using experiments in animal models  
325 although we used human data to perform the analysis. Although testing the effects of  
326 drugs on human ageing is challenging, progress is starting to be made. A clinical trial  
327 conducted by Mannick et al. (2018)[8] showed that pharmacological inhibition of the  
328 mammalian target of rapamycin in humans by dactolisib plus everolimus reduces the  
329 rate of infections in elderly people. Moreover, a recent short-term clinical trial of  
330 sirolimus established its safety in healthy individuals [50]. Similarly, supplementation  
331 of nicotinamide ribose, identified as a possible CR mimetic, stimulated NAD+

332 metabolism in healthy individuals aged 55 to 79 years [51]. Some mechanisms of  
333 ageing may be confined to humans and their near relatives, and ideally, the  
334 bioinformatic findings should be evaluated in humans, initially through genetic  
335 epidemiology and ultimately through clinical trials.

## 336 **Methods**

### 337 **Data sources**

338 **Drug-protein interaction dataset:** Chemical-protein interactions were extracted from  
339 the Search Tool for Interactions of Chemicals (STITCH) database 5.0 [21]. We chose  
340 this resource because it acts as a probabilistic network, by collecting interactions from  
341 multiple sources, including experiments, databases and a text-mining algorithm.  
342 Individual scores for each source are combined into an overall confidence score using a  
343 naive Bayesian formula defined as  $Score = 1 - \prod_i (1 - S_i)$ , where  $S_i$  represents the  
344 confidence score for the source  $i$ . Later, because the Bayesian combination of scores can  
345 overestimate the effect of small individual contributions, the score is corrected for the  
346 probability of observing an interaction by chance. The overall confidence score ranges  
347 from 0 to 1, where a value of 0.4 or greater is considered as medium confidence, and a  
348 score equal to or higher than 0.7 is regarded as high confidence. To obtain a reliable set  
349 of interactions, we removed all interactions with a confidence score lower than 0.7. The  
350 database also maps the direction of each interaction, i.e. whether chemical acts on the  
351 protein or if the protein modifies the chemical (e.g. transformation of the chemical  
352 during a catalytic reaction). To confine the analysis to the actions of chemicals on  
353 proteins, only the cases where the chemical activates or inhibits a protein were retained.  
354 To focus on drugs in development or approved for human use, we filtered the chemicals  
355 in STITCH by the drugs in DrugBank 5.0 [22] using UniChem [23]. The InChi key for  
356 each drug was retrieved from PubChem (<http://pubchemdocs.ncbi.nlm.nih.gov/pug-rest>)  
357 and used to obtain the DrugBank identifiers via UniChem  
358 (<https://www.ebi.ac.uk/unicem/info/webservices>). The names of the drugs were  
359 obtained from the DrugBank vocabulary file, and the development status was acquired  
360 using the structure external links file. Finally, we mapped the Ensembl identifiers for



361 each protein into HUGO Gene Nomenclature Committee (HGNC) approved gene  
362 names using Ensembl Biomart (version 91) [52]. All the chemicals included in this  
363 dataset will be referred as “drugs” or “compounds” throughout this article.

364

365 **Drug-related terms:** We mapped the targets of each drug in the drug-protein  
366 interaction dataset to multiple biological levels by using the information about the genes  
367 that define each level analysed. We downloaded the gene-centric definitions of *GO*  
368 *terms* and *Reactome pathways* from the DAVID knowledgebase [37]. Genes on each  
369 *KEGG pathways* were obtained using the biological database network ([https://biodbnet-  
370 abcc.ncifcrf.gov/db/db2db.php](https://biodbnet-abcc.ncifcrf.gov/db/db2db.php))[38]. *Protein-protein interactions* were mapped directly  
371 using the STRING database [53]. Only proteins interacting with the set of ageing-  
372 related genes with a confidence equal or higher than 0.9 were considered.

373

374 **Ageing-related genes:** Genes present in manually-curated databases are more  
375 susceptible to research and reporting bias than those found in objective searches. Instead  
376 of selecting a set of ageing-related genes from a particular study or database, we used  
377 genes linked with ageing from the Ageing Clusters resource  
378 (<https://gemex.eurac.edu/bioinf/age/>). This repository contains the results of a network-  
379 based meta-analysis of human ageing genes [24] that considered 35 different datasets.  
380 The author classified the genes into the following 4 categories: curated ageing-related  
381 genes from databases such as GenAge [27], LongevityMap [25] and CSGene [26];  
382 genes differentially expressed with age, regimes of CR or healthy ageing; age-related  
383 changes in the methylation of cytosine guanine dinucleotides (CpGs) in the DNA; and  
384 genes associated with age-related diseases from databases such as the Human Gene  
385 Mutation [54] or the Human Phenotype Ontology [55]. To improve the reliability of the

386 set of ageing-related genes and reduce research bias we considered only the genes  
387 present in at least two categories.

388

389 **Ageing-related terms:** Using the set of ageing-related genes we performed gene-based  
390 enrichment analysis to infer the function and pathways associated with ageing. *Gene*  
391 *Ontology (BP, CC, MF)* terms were calculated using the enrichGO function from the  
392 clusterProfiler package [56], using the Benjamini and Yekutieli [57] method for  
393 adjustment, a conservative correction that does not rely on the assumption that the test  
394 statistics are independent. P-value and q-value cutoff were set to 0.5 and for biological  
395 processes we consider the top 500 terms enriched. Enriched *KEGG pathways* were  
396 determined using the enrichKEGG function from the clusterProfiler package, using the  
397 same parameters used for the gene ontology enrichment. *Reactome pathways* were  
398 calculated using the function enrichPathway from the ReactomePA package [58].  
399 *Protein-protein interactions*, were obtained using STRING [53] database.

400

#### 401 **Statistical analysis to rank the drugs**

402 Independently of the biological level, the drug-ageing associated was inferred by  
403 calculating the statistical significance of the drug-related terms and ageing-related terms  
404 using a Fisher's exact test. Drugs were associated with ageing at the following  
405 biological levels: gene, pathways (KEGG, Reactome), functions (GO:BP, GO:CC,  
406 GO:MF) and indirect protein interactions. The universe was defined as all the terms on  
407 each level associated with at least one drug. Thus, drugs with a lower p-value modulate  
408 a higher proportion of ageing-related terms than that expected by chance. To control for  
409 the false discovery rate, we used the Benjamini and Yekutieli adjustment [57]. A p-  
410 value lower than 0.05 after multiple testing correction was considered significant.

411

## 412 **Measuring the impact of research bias**

413 Some drugs have been more studied than others, which could bias the results towards  
414 drugs with a higher proportion of discovered targets. To evaluate the impact of this  
415 research bias, we randomly selected the same number of terms that were used as ageing-  
416 related terms 1,000 times, and we repeated the statistical analysis. Then we counted the  
417 times the statistically significant drugs appeared on the same or lower ranking. We  
418 expected that drugs associated with many terms would rank higher independently of the  
419 random set generated.

420

## 421 **Enrichment for pro-longevity drugs**

422 Each of the drug lists generated were ranked by the p-values obtained from the  
423 statistical analysis. Then, we transformed the ranking of the drug into a value ranging  
424 from 0 to 1. A set of 142 pro-longevity drugs present in the DrugAge and DrugBank  
425 databases were used to determine the occurrence and ranking of pro-longevity  
426 compounds in the lists. The ranking was then scaled into a value between 0 to 1. The  
427 AUC between the variables describing the pro-longevity drugs and drugs analysed was  
428 calculated using the function AUC from the DescTools package ([https://cran.r-](https://cran.r-project.org/package=DescTools)  
429 [project.org/package=DescTools](https://cran.r-project.org/package=DescTools)). To measure its statistical significance, we calculated  
430 the AUC of the lists previously generated to measure the research bias, and we counted  
431 the number of simulations with an equal or higher AUC.

432

## 433 **Experimental procedure**

### 434 **Worm husbandry and lifespan**

435 N2 and TJ3002 (*zSi3002[hsp-16.2p::mCherry::unc-54; Cbr-unc-119(+)] II* )  
436 hermaphrodite worms were maintained as previously described [59] at 20°C on 60 mm  
437 NGM plates. Plates were seeded with *Escherichia coli* (OP50) grown overnight in LB  
438 media. RNAi was essentially performed as previously described [60] with the slight  
439 modifications that bacterial cultures were induced with 5 mM IPTG for 3 hours  
440 following overnight growth in LB, and tetracycline was not included in plates or  
441 bacterial cultures.

442

#### 443 **Tanespimycin dose-response test**

444 Tanespimycin (Fisher Scientific) was solubilized in DMSO to stock concentrations of 1,  
445 10, 25, 50, and 100 mM. 1 ml of DMSO or tanespimycin solutions were added to each  
446 litre of NGM media just prior to plate pouring to reach final concentrations of 1, 10, 25,  
447 50, and 100 µM in plates. Plates were kept away from light, stored at 4°C, and used  
448 within 2 weeks of pouring. TJ3002 reporter worms were synchronised by bleaching and  
449 added to 0.1% DMSO or tanespimycin plates as L1s or as day 1 adults. Worms were  
450 transferred to fresh plates every day and then imaged on day 6 of adulthood using a  
451 Zeiss Apotome fluorescent microscope and Hamamatsu Orca Flash 4.0 camera.  
452 Brightness and contrast were adjusted linearly, and equally, for all images, using Adobe  
453 Photoshop CS6. Fluorescence intensity was measured under different conditions using  
454 ImageJ. Significance testing of differences in fluorescence intensity were calculated by  
455 ONE-WAY ANOVA with Tukey pair-wise comparison of groups using GraphPad  
456 Prism.

457

#### 458 **Lifespan assays**

459 Gravid N2 adults were bleached to release eggs, and L1 larvae were allowed to hatch  
460 overnight in M9 buffer without food. L1 worms were then added to plates seeded with  
461 bacteria expressing an RNAi control vector (L4440) and containing 0.1% DMSO.  
462 Worms were added to plates at a density of approximately 50 worms per plate. On the  
463 first day of adulthood (50h post plating L1s), worms were transferred to new 0.1%  
464 DMSO plates or 100  $\mu$ M tanespimycin plates, seeded with L4440 or bacteria expressing  
465 dsRNA against hsp-90 (hsp-90(RNAi)). Worms were transferred to fresh plates every  
466 day during the first 7 days of adulthood and every other day thereafter. Worms were  
467 scored for survival every two days by gently prodding animals repeatedly with a  
468 platinum wire. Animals that failed to exhibit signs of movement or pharyngeal pumping  
469 were scored as dead. Animals that displayed internal hatching of progeny (“bagging”)  
470 or prolapse of intestine through the vulva (“rupturing”) were censored from our  
471 analysis. Median lifespans and significance testing between lifespans of different  
472 treatment groups were performed in GraphPad Prism using a Log-rank (Mantel-Cox)  
473 test.

474

## 475 **Acknowledgments**

476 The authors thank the Partridge Lab and Dobril Ivanov for the support and helpful  
477 discussions. This work was funded by Comisión Nacional de Investigación Científica y  
478 Tecnológica - Government of Chile (CONICYT scholarship) (M.F.V.), BBSRC David  
479 Phillips Fellowship [BB/P005535/1] (J.L.), EMBL (H.M.D., J.M.T.), and the Wellcome  
480 Trust [WT098565/Z/12/Z] (L.P., J.M.T). H.M.D is a member of Darwin College,  
481 University of Cambridge.

## 482 **References**

- 483 1. Niccoli T, Partridge L. Ageing as a risk factor for disease. *Curr Biol.* 2012;22:  
484 R741–R752. doi:10.1016/j.cub.2012.07.024
- 485 2. Longo VD, Antebi A, Bartke A, Barzilai N, Brown-Borg HM, Caruso C, et al.  
486 Interventions to slow aging in humans: Are we ready? *Aging Cell.* Wiley-  
487 Blackwell; 2015;14: 497–510. doi:10.1111/accel.12338
- 488 3. Andersen SL, Sebastiani P, Dworkis DA, Feldman L, Perls TT. Health span  
489 approximates life span among many supercentenarians: Compression of  
490 morbidity at the approximate limit of life span. *Journals Gerontol - Ser A Biol*  
491 *Sci Med Sci.* 2012;67 A: 395–405. doi:10.1093/gerona/glr223
- 492 4. Newman JC, Milman S, Hashmi SK, Austad SN, Kirkland JL, Halter JB, et al.  
493 Strategies and Challenges in Clinical Trials Targeting Human Aging. *Journals*  
494 *Gerontol Ser A Biol Sci Med Sci.* 2016;71: 1424–1434.  
495 doi:10.1093/gerona/glw149
- 496 5. Partridge L. Gerontology: Extending the healthspan. *Nature.* 2016;529: 154–154.  
497 doi:10.1038/529154a
- 498 6. Barzilai N, Crandall JP, Kritchevsky SB, Espeland MA. Metformin as a Tool to  
499 Target Aging. *Cell Metab.* 2016;23: 1060–1065. doi:10.1016/j.cmet.2016.05.011
- 500 7. Mannick JB, Del Giudice G, Lattanzi M, Valiante NM, Praestgaard J, Huang B,  
501 et al. mTOR inhibition improves immune function in the elderly. *Sci Transl Med.*  
502 *United States;* 2014;6: 268ra179. doi:10.1126/scitranslmed.3009892
- 503 8. Mannick JB, Morris M, Hockey H-UP, Roma G, Beibel M, Kulmatycki K, et al.  
504 TORC1 inhibition enhances immune function and reduces infections in the  
505 elderly. *Sci Transl Med. American Association for the Advancement of Science;*  
506 2018;10: eaaq1564. doi:10.1126/scitranslmed.aaq1564

- 507 9. Tsubota K. The first human clinical study for NMN has started in Japan. *npj*  
508 *Aging Mech Dis.* 2016;2: 16021. doi:10.1038/npjamd.2016.21
- 509 10. Calvert S, Tacutu R, Sharifi S, Teixeira R, Ghosh P, de Magalhães JP. A network  
510 pharmacology approach reveals new candidate caloric restriction mimetics in *C.*  
511 *elegans.* *Aging Cell.* 2016;15: 256–266. doi:10.1111/accel.12432
- 512 11. Ziehm M, Kaur S, Ivanov DK, Ballester PJ, Marcus D, Partridge L, et al. Drug  
513 repurposing for aging research using model organisms. *Aging Cell.* 2017;16:  
514 1006–1015. doi:10.1111/accel.12626
- 515 12. Liu H, Guo M, Xue T, Guan J, Luo L, Zhuang Z. Screening lifespan-extending  
516 drugs in *Caenorhabditis elegans* via label propagation on drug-protein networks.  
517 *BMC Syst Biol.* 2016;10: 509–519. doi:10.1186/s12918-016-0362-4
- 518 13. Barardo D, Thornton D, Thoppil H, Walsh M, Sharifi S, Ferreira S, et al. The  
519 DrugAge database of aging-related drugs. *Aging Cell.* 2017;16: 594–597.  
520 doi:10.1111/accel.12585
- 521 14. Barardo DG, Newby D, Thornton D, Ghafourian T, de Magalhães JP, Freitas  
522 AA. Machine learning for predicting lifespan-extending chemical compounds.  
523 *Aging (Albany NY).* 2017;9: 1721–1737. doi:10.18632/aging.101264
- 524 15. Fernandes M, Wan C, Tacutu R, Barardo D, Rajput A, Wang J, et al. Systematic  
525 analysis of the gerontome reveals links between aging and age-related diseases.  
526 *Hum Mol Genet.* 2016;25: 4804–4818. doi:10.1093/hmg/ddw307
- 527 16. Aliper A, Belikov A V., Garazha A, Jellen L, Artemov A, Suntsova M, et al. In  
528 search for geroprotectors: In silico screening and in vitro validation of signalome-  
529 level mimetics of young healthy state. *Aging (Albany NY).* 2016;8: 2127–2152.  
530 doi:10.18632/aging.101047
- 531 17. Zhavoronkov A, Buzdin AA, Garazha A V., Borisov NM, Moskalev AA.

- 532            Signaling pathway cloud regulation for in silico screening and ranking of the  
533            potential geroprotective drugs. *Front Genet.* 2014;5: 49.  
534            doi:10.3389/fgene.2014.00049
- 535    18.    Dönertaş HM, Fuentealba Valenzuela M, Partridge L, Thornton JM. Gene  
536            expression-based drug repurposing to target aging. *Aging Cell.* Wiley/Blackwell  
537            (10.1111); 2018; e12819. doi:10.1111/accel.12819
- 538    19.    Lamb J, Crawford ED, Peck D, Modell JW, Blat IC, Wrobel MJ, et al. The  
539            connectivity map: Using gene-expression signatures to connect small molecules,  
540            genes, and disease. *Science* (80- ). 2006;313: 1929–1935.  
541            doi:10.1126/science.1132939
- 542    20.    Fisher RA. On the Interpretation of  $\chi^2$  from Contingency Tables, and the  
543            Calculation of P. *J R Stat Soc.* WileyRoyal Statistical Society; 1922;85: 87.  
544            doi:10.2307/2340521
- 545    21.    Szklarczyk D, Santos A, Von Mering C, Jensen LJ, Bork P, Kuhn M. STITCH 5:  
546            Augmenting protein-chemical interaction networks with tissue and affinity data.  
547            *Nucleic Acids Res.* 2016;44: D380–D384. doi:10.1093/nar/gkv1277
- 548    22.    Law V, Knox C, Djoumbou Y, Jewison T, Guo AC, Liu Y, et al. DrugBank 4.0:  
549            Shedding new light on drug metabolism. *Nucleic Acids Res.* 2014;42: D1091–  
550            D1097. doi:10.1093/nar/gkt1068
- 551    23.    Chambers J, Davies M, Gaulton A, Hersey A, Velankar S, Petryszak R, et al.  
552            UniChem: A unified chemical structure cross-referencing and identifier tracking  
553            system. *J Cheminform.* Nature Publishing Group; 2013;5: 3. doi:10.1186/1758-  
554            2946-5-3
- 555    24.    Blankenburg H, Pramstaller PP, Domingues FS. A network-based meta-analysis  
556            for characterizing the genetic landscape of human aging. *Biogerontology.*



- 557 2018;19: 81–94. doi:10.1007/s10522-017-9741-5
- 558 25. Budovsky A, Craig T, Wang J, Tacutu R, Csordas A, Lourenço J, et al.  
559 LongevityMap: a database of human genetic variants associated with longevity.  
560 Trends Genet. Elsevier; 2013;29: 559–60. doi:10.1016/j.tig.2013.08.003
- 561 26. Zhao M, Chen L, Qu H. CSGene: a literature-based database for cell senescence  
562 genes and its application to identify critical cell aging pathways and associated  
563 diseases. Cell Death Dis. 2016;7: e2053. doi:10.1038/cddis.2015.414
- 564 27. Tacutu R, Craig T, Budovsky A, Wuttke D, Lehmann G, Taranukha D, et al.  
565 Human Ageing Genomic Resources: Integrated databases and tools for the  
566 biology and genetics of ageing. Nucleic Acids Res. 2013;41: D1027–D1033.  
567 doi:10.1093/nar/gks1155
- 568 28. Tong JJ, Schriener SE, McCleary D, Day BJ, Wallace DC. Life extension through  
569 neurofibromin mitochondrial regulation and antioxidant therapy for  
570 neurofibromatosis-1 in *Drosophila melanogaster*. Nat Genet. Nature Publishing  
571 Group; 2007;39: 476–485. doi:10.1038/ng2004
- 572 29. Hao Z, Liu Y, Li Y, Song W, Yu J, Li H, et al. Association between longevity  
573 and element levels in food and drinking water of typical Chinese longevity area. J  
574 Nutr Heal Aging. 2016;20: 897–903. doi:10.1007/s12603-016-0690-5
- 575 30. Lee E-H, Myung S-K, Jeon Y-J, Kim Y, Chang YJ, Ju W, et al. Effects of  
576 Selenium Supplements on Cancer Prevention: Meta-analysis of Randomized  
577 Controlled Trials. Nutr Cancer. Taylor & Francis Group ; 2011;63: 1185–1195.  
578 doi:10.1080/01635581.2011.607544
- 579 31. Fuhrmann-Stroissnigg H, Ling YY, Zhao J, McGowan SJ, Zhu Y, Brooks RW, et  
580 al. Identification of HSP90 inhibitors as a novel class of senolytics. Nat  
581 Commun. 2017;8: 422. doi:10.1038/s41467-017-00314-z

- 582 32. Fujikake N, Nagai Y, Popiel HA, Okamoto Y, Yamaguchi M, Toda T. Heat  
583 shock transcription factor 1-activating compounds suppress polyglutamine-  
584 induced neurodegeneration through induction of multiple molecular chaperones.  
585 *J Biol Chem.* 2008;283: 26188–26197. doi:10.1074/jbc.M710521200
- 586 33. Buttiglieri S, Ruella M, Risso A, Spatola T, Silengo L, Avvedimento EV, et al.  
587 The aging effect of chemotherapy on cultured human mesenchymal stem cells.  
588 *Exp Hematol.* 2011;39: 1171–1181. doi:10.1016/j.exphem.2011.08.009
- 589 34. Barabas K, Milner R, Lurie D, Adin C. Cisplatin: A review of toxicities and  
590 therapeutic applications. *Vet Comp Oncol.* 2008;6: 1–18. doi:10.1111/j.1476-  
591 5829.2007.00142.x
- 592 35. Petrova N V., Velichko AK, Razin S V., Kantidze OL. Small molecule  
593 compounds that induce cellular senescence. *Aging Cell.* 2016;15: 999–1017.  
594 doi:10.1111/accel.12518
- 595 36. Aliper A, Jellen L, Cortese F, Artemov A, Karpinsky-Semper D, Moskalev A, et  
596 al. Towards natural mimetics of metformin and rapamycin. *Aging (Albany NY).*  
597 2017;9: 2245–2268. doi:10.18632/aging.101319
- 598 37. Huang DW, Sherman BT, Tan Q, Collins JR, Alvord WG, Roayaei J, et al. The  
599 DAVID Gene Functional Classification Tool: A novel biological module-centric  
600 algorithm to functionally analyze large gene lists. *Genome Biol.* 2007;8: 1–16.  
601 doi:10.1186/gb-2007-8-9-r183
- 602 38. Mudunuri U, Che A, Yi M, Stephens RM, Bateman A. bioDBnet: the biological  
603 database network. *Bioinforma Appl NOTE.* 2009;25: 555–556.  
604 doi:10.1093/bioinformatics/btn654
- 605 39. Tao D, Lu J, Sun H, Zhao Y-M, Yuan Z-G, Li X-X, et al. Trichostatin A Extends  
606 the Lifespan of *Drosophila melanogaster* by Elevating hsp22 Expression. *Acta*

- 607 Biochim Biophys Sin (Shanghai). 2004;36: 618–622. doi:10.1093/abbs/36.9.618
- 608 40. Ching TT, Chiang WC, Chen CS, Hsu AL. Celecoxib extends *C. elegans* lifespan  
609 via inhibition of insulin-like signaling but not cyclooxygenase-2 activity. *Aging*  
610 *Cell*. 2011;10: 506–519. doi:10.1111/j.1474-9726.2011.00688.x
- 611 41. Mendenhall AR, Tedesco PM, Sands B, Johnson TE, Brent R. Single Cell  
612 Quantification of Reporter Gene Expression in Live Adult *Caenorhabditis*  
613 *elegans* Reveals Reproducible Cell-Specific Expression Patterns and Underlying  
614 Biological Variation. *PLoS One*. 2015;10: 124289.  
615 doi:10.1371/journal.pone.0124289
- 616 42. Melo JA, Ruvkun G. Inactivation of Conserved *C. elegans* Genes Engages  
617 Pathogen- and Xenobiotic-Associated Defenses. *Cell*. 2012;149: 452–466.  
618 doi:10.1016/j.cell.2012.02.050
- 619 43. Somogyvári M, Gecse E, Söti C. DAF-21/Hsp90 is required for *C. elegans*  
620 longevity by ensuring DAF-16/FOXO isoform A function. *Sci Rep. Nature*  
621 *Publishing Group*; 2018;8: 12048. doi:10.1038/s41598-018-30592-6
- 622 44. Kirkland JL, Tchkonja T. Cellular Senescence: A Translational Perspective.  
623 *EBioMedicine. Elsevier*; 2017;21: 21–28. doi:10.1016/J.EBIOM.2017.04.013
- 624 45. Zhu Y, Tchkonja T, Pirskhalava T, Gower AC, Ding H, Giorgadze N, et al. The  
625 Achilles' heel of senescent cells: from transcriptome to senolytic drugs. *Aging*  
626 *Cell*. 2015;14: 644–658. doi:10.1111/accel.12344
- 627 46. Griffith M, Griffith OL, Coffman AC, Weible J V., McMichael JF, Spies NC, et  
628 al. DGIdb: Mining the druggable genome. *Nat Methods. NIH Public Access*;  
629 2013;10: 1209–1210. doi:10.1038/nmeth.2689
- 630 47. Issa NT, Kruger J, Wathieu H, Raja R, Byers SW, Dakshanamurthy S.  
631 *DrugGenEx-Net: A novel computational platform for systems pharmacology and*

- 632 gene expression-based drug repurposing. *BMC Bioinformatics*. 2016;17: 202.  
633 doi:10.1186/s12859-016-1065-y
- 634 48. Tung CW. ChemDIS: A chemical-disease inference system based on chemical-  
635 protein interactions. *J Cheminform*. 2015;7: 1–7. doi:10.1186/s13321-015-0077-  
636 3
- 637 49. Sorgenfrei FA, Fulle S, Merget B. Kinome-Wide Profiling Prediction of Small  
638 Molecules. *ChemMedChem*. 2017; doi:10.1002/cmdc.201700180
- 639 50. Kraig E, Linehan LA, Liang H, Romo TQ, Liu Q, Wu Y, et al. A randomized  
640 control trial to establish the feasibility and safety of rapamycin treatment in an  
641 older human cohort: Immunological, physical performance, and cognitive effects.  
642 *Exp Gerontol*. 2018; doi:10.1016/j.exger.2017.12.026
- 643 51. Martens CR, Denman BA, Mazzo MR, Armstrong ML, Reisdorph N, Mcqueen  
644 MB, et al. 高齢ヒト NR投与でNAD増加 血管機能の改善が見られた  
645 Chronic nicotinamide riboside supplementation is well-tolerated and elevates  
646 NAD + in healthy middle-aged and older adults. *Nat Commun*. Nature  
647 Publishing Group; 2018;9: 1286. doi:10.1038/s41467-018-03421-7
- 648 52. Durinck S, Spellman PT, Birney E, Huber W. Mapping identifiers for the  
649 integration of genomic datasets with the R/ Bioconductor package biomaRt. *Nat*  
650 *Protoc*. Nature Publishing Group; 2009;4: 1184–1191. doi:10.1038/nprot.2009.97
- 651 53. von Mering C, Jensen LJ, Snel B, Hooper SD, Krupp M, Foglierini M, et al.  
652 STRING: Known and predicted protein-protein associations, integrated and  
653 transferred across organisms. *Nucleic Acids Res*. 2005;33: D433–D437.  
654 doi:10.1093/nar/gki005
- 655 54. Cooper DN, Ball E V, Krawczak M. The human gene mutation database. *Nucleic*  
656 *Acids Res*. 1998;26: 285–7. Available:

- 657 <http://www.ncbi.nlm.nih.gov/pubmed/9399854>
- 658 55. Robinson PN, Köhler S, Bauer S, Seelow D, Horn D, Mundlos S. The Human  
659 Phenotype Ontology: a tool for annotating and analyzing human hereditary  
660 disease. *Am J Hum Genet.* Elsevier; 2008;83: 610–5.  
661 doi:10.1016/j.ajhg.2008.09.017
- 662 56. Yu G, Wang L-G, Han Y, He Q-Y. clusterProfiler: an R package for comparing  
663 biological themes among gene clusters. *OMICS.* Mary Ann Liebert, Inc.;  
664 2012;16: 284–7. doi:10.1089/omi.2011.0118
- 665 57. Benjamini Y, Yekutieli D. The control of the false discovery rate in multiple  
666 testing under dependency. *Ann Stat.* 2001;29: 1165–1188.  
667 doi:10.1214/aos/1013699998
- 668 58. Yu G, He Q-Y. ReactomePA: an R/Bioconductor package for reactome pathway  
669 analysis and visualization. *Mol Biosyst.* 2016;12: 477–9.  
670 doi:10.1039/c5mb00663e
- 671 59. Brenner S. The genetics of *Caenorhabditis elegans*. *Genetics.* 1974;77: 71–94.  
672 Available: <http://www.ncbi.nlm.nih.gov/pubmed/4366476>
- 673 60. Kamath RS, Fraser AG, Dong Y, Poulin G, Durbin R, Gotta M, et al. Systematic  
674 functional analysis of the *Caenorhabditis elegans* genome using RNAi. *Nature.*  
675 Nature Publishing Group; 2003;421: 231–237. doi:10.1038/nature01278  
676

677 **Figures**

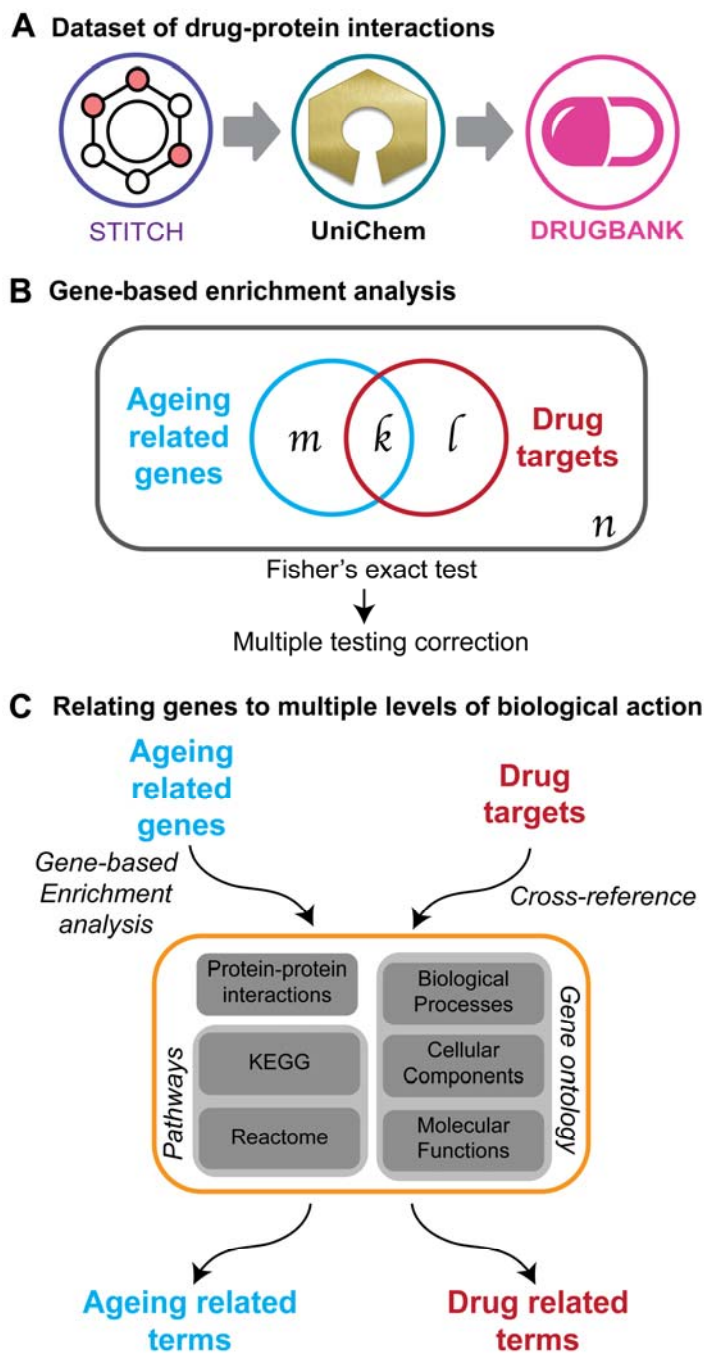

678 **Fig 1. Overview of the methods used in this study to prioritise compounds likely to**  
679 **ameliorate ageing in humans.** A) STITCH chemicals were mapped into DrugBank  
680 drugs using the UniChem resource programmatically. B) The significance of the drug-  
681 ageing inference was calculated using a Fisher's exact test, which calculates the  
682 probability that the overlap between two samples (ageing-related genes and drug

683 targets) drawn from the same universe is due to chance. This comparison was made at  
684 different biological tiers. C) Diagram of the procedure to expand the “gene” information  
685 into multiple biological levels. Ageing-related genes were mapped to other levels using  
686 an enrichment analysis, while the drugs’ targets were cross-referenced with the list of  
687 genes defining each annotation.

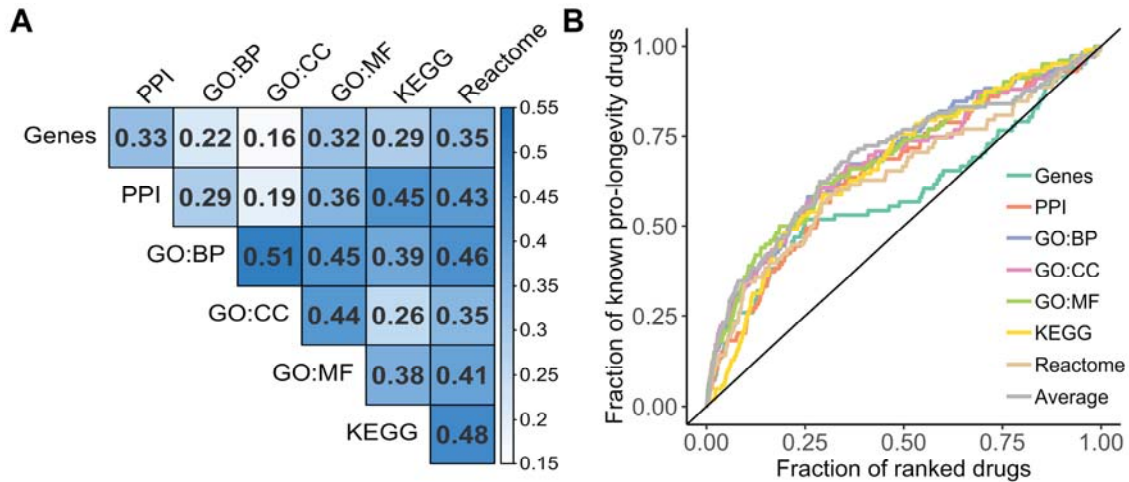

688

689 **Fig 2. Comparison between the results using different data sources.** A) Correlation  
690 between the ranked list of compounds. Boxes are coloured by the Kendall’s correlation  
691 coefficient. B) Enrichment curves for pro-longevity drugs. The results of each data  
692 source are displayed in lines with different colours. The enrichment expected by chance  
693 is shown as a diagonal line with AUC = 0.5.

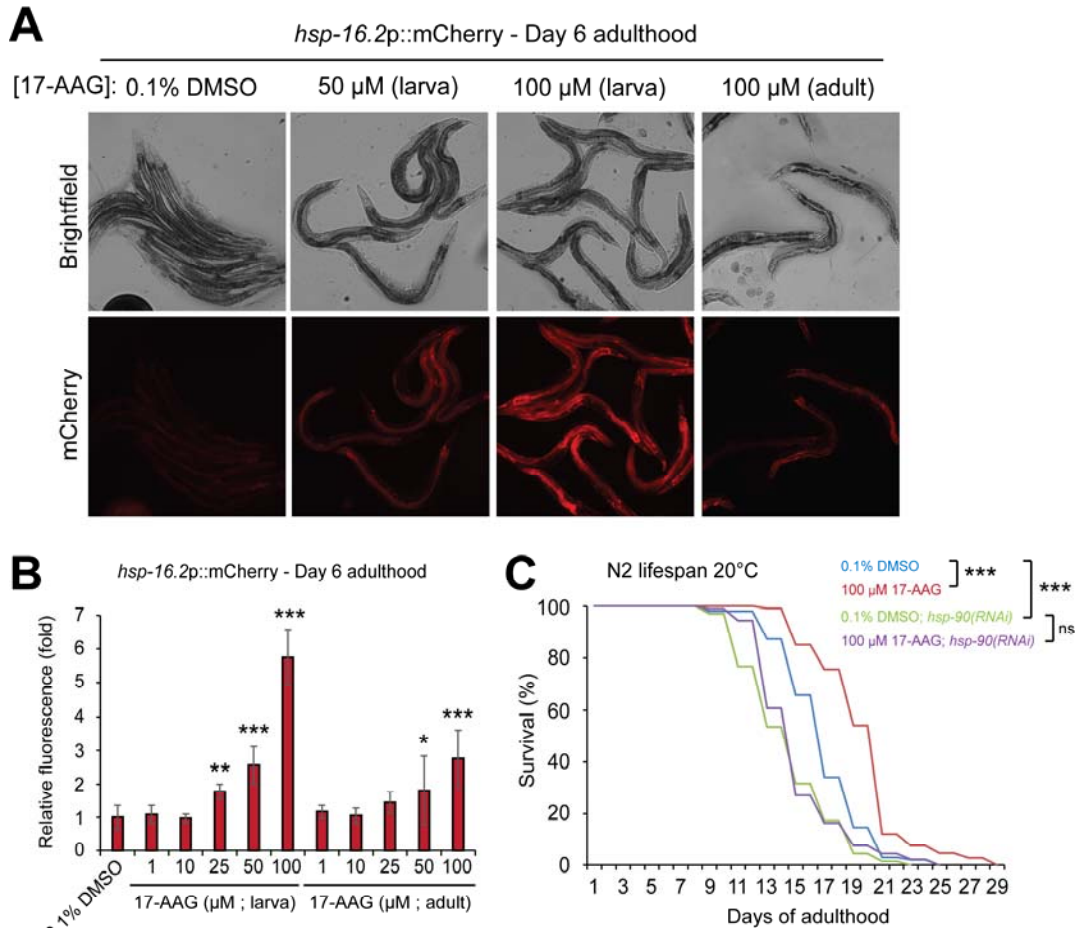

694 **Fig 3. Pro-longevity effect of tanespimycin in *C. elegans*.** A) Representative  
 695 fluorescent images of day 6 adult, *hsp-16.2p::mCherry* transcriptional reporter worms,  
 696 grown on plates containing 0.1% DMSO (vehicle) or different concentrations of  
 697 tanespimycin (17-AAG) continuously from the first larval stage, or exclusively from the  
 698 first day of adulthood onward. B) The relative fluorescent intensity of *hsp-*  
 699 *16.2p::mCherry* worms grown on plates containing 0, 1, 10, 25, 50, or 100  $\mu$ M  
 700 tanespimycin (17-AAG) continuously from the first larval stage or exclusively from the  
 701 first day of adulthood onward. Values plotted are the mean of at least 5 animals, and  
 702 error bars represent the standard deviation from the mean. Statistical significance  
 703 relative to the DMSO control group was calculated by ONE-WAY ANOVA with Tukey  
 704 post analysis pairwise comparison of groups. \* =  $p < 0.05$ , \*\* =  $p < 0.01$ , \*\*\* =  $p <$   
 705  $0.001$ . C) – Lifespan at 20 °C of N2 worms grown on plates containing 0.1% DMSO or



706 100  $\mu$ M Tanespimycin (17-AAG) from the first day of adulthood onward in the  
 707 presence or absence of hsp-90(RNAi). Statistical significance was calculated by Log-  
 708 rank (Mantel-Cox) test. \*\*\* =  $p < 0.001$ . Treatment groups: 0.1% DMSO (n = 102, 14  
 709 censored, median lifespan = 17 days), 100  $\mu$ M tanespimycin (n=107, 9 censored,  
 710 median lifespan 21 days), 0.1% DMSO + hsp-90(RNAi) (n = 69, 30 censored, median  
 711 lifespan = 15 days), 100  $\mu$ M tanespimycin + hsp-90(RNAi) (n = 92, 22 censored,  
 712 median lifespan = 15 days).

713

## 714 **Tables**

715 **Table 1. Drugs significantly enriched for ageing-related targets.** The names of the  
 716 drugs previously shown to extend lifespan in animal models are in bold and genotoxic  
 717 molecules are in italic. The columns k(l) and m(n) are consistent with the diagram in  
 718 Fig 1B. OR stands for odd-ratios and adj.p-value is the p-value adjusted for multiple  
 719 testing.

| <b>Drug name</b>                | <b>Status</b>   | <b>k(l)</b> | <b>m(n)</b> | <b>OR</b> | <b>p-value</b> | <b>adj.p-value</b> |
|---------------------------------|-----------------|-------------|-------------|-----------|----------------|--------------------|
| <b>Resveratrol</b>              | Approved        | 66(150)     | 388(2221)   | 2.52      | 2.09E-08       | 1.82E-04           |
| Sunitinib                       | Approved        | 18(12)      | 436(2359)   | 8.11      | 4.92E-08       | 2.15E-04           |
| <b>Genistein</b>                | Investigational | 41(80)      | 413(2291)   | 2.84      | 6.40E-07       | 1.86E-03           |
| <b>Simvastatin</b>              | Approved        | 39(77)      | 415(2294)   | 2.80      | 1.53E-06       | 3.35E-03           |
| Tanespimycin                    | Investigational | 15(12)      | 439(2359)   | 6.71      | 2.64E-06       | 4.62E-03           |
| Regorafenib                     | Approved        | 12(7)       | 442(2364)   | 9.16      | 4.43E-06       | 6.45E-03           |
| <b>Epigallocatechin gallate</b> | Investigational | 42(93)      | 412(2278)   | 2.50      | 5.96E-06       | 7.44E-03           |
| <i>Doxorubicin</i>              | Approved        | 34(67)      | 420(2304)   | 2.78      | 7.20E-06       | 7.87E-03           |
| Selenium                        | Approved        | 14(12)      | 440(2359)   | 6.25      | 9.44E-06       | 9.17E-03           |
| <b>Celecoxib</b>                | Approved        | 23(36)      | 431(2335)   | 3.46      | 1.58E-05       | 1.38E-02           |
| Indole-3-carbinol               | Investigational | 13(11)      | 441(2360)   | 6.32      | 1.83E-05       | 1.46E-02           |
| <i>Hydrogen peroxide</i>        | Approved        | 59(165)     | 395(2206)   | 2.00      | 2.85E-05       | 2.07E-02           |
| GW-501516                       | Investigational | 9(5)        | 445(2366)   | 9.56      | 6.23E-05       | 3.82E-02           |
| Bexarotene                      | Approved        | 10(7)       | 444(2364)   | 7.60      | 6.98E-05       | 3.82E-02           |
| Dorsomorphin                    | Experimental    | 10(7)       | 444(2364)   | 7.60      | 6.98E-05       | 3.82E-02           |
| Sorafenib                       | Approved        | 23(41)      | 431(2330)   | 3.03      | 7.25E-05       | 3.82E-02           |
| <b>Sirolimus</b>                | Approved        | 37(88)      | 417(2283)   | 2.30      | 7.42E-05       | 3.82E-02           |
| <i>Cisplatin</i>                | Approved        | 34(78)      | 420(2293)   | 2.38      | 8.39E-05       | 4.07E-02           |
| cAMP                            | Experimental    | 36(86)      | 418(2285)   | 2.29      | 1.00E-04       | 4.60E-02           |

720

721 **Table 2. Top-ranked compounds using multiple levels of biological action.** The  
 722 names of the drugs previously shown to extend lifespan in animal models are in bold.  
 723 The numeric values represent the ranking of the drugs when different sources of data  
 724 (columns) are used. The last column is the ranking average (Avg.) for each drug in the 7  
 725 ranked lists.

| Drug name           | Status          | Genes | PPI | Gene ontology |    |    | Pathways |          | Avg.  |
|---------------------|-----------------|-------|-----|---------------|----|----|----------|----------|-------|
|                     |                 |       |     | BP            | CC | MF | KEGG     | Reactome |       |
| Tanespimycin        | Investigational | 5     | 26  | 57            | 43 | 44 | 39       | 9        | 31.86 |
| Imatinib            | Approved        | 63    | 3   | 21            | 34 | 12 | 66       | 38       | 33.86 |
| Sunitinib           | Approved        | 2     | 1   | 59            | 31 | 31 | 56       | 63       | 34.71 |
| <b>Trichostatin</b> | Experimental    | 83    | 41  | 19            | 54 | 13 | 41       | 52       | 43.29 |
| <b>Geldanamycin</b> | Investigational | 32    | 37  | 87            | 76 | 47 | 13       | 21       | 44.71 |
| Sorafenib           | Approved        | 16    | 68  | 11            | 15 | 8  | 155      | 42       | 45.00 |
| Dasatinib           | Approved        | 41    | 12  | 43            | 81 | 62 | 49       | 35       | 46.14 |
| Erlotinib           | Approved        | 27    | 6   | 93            | 85 | 71 | 64       | 7        | 50.43 |
| Etoposide           | Approved        | 23    | 11  | 20            | 90 | 32 | 120      | 67       | 51.86 |
| <b>Celecoxib</b>    | Approved        | 10    | 2   | 33            | 42 | 34 | 180      | 70       | 53.00 |

726
